# Supplementary material for: A novel mass spectrometry-cleavable, phosphate-based enrichable and multi-targeting protein cross-linker
Source: PubMed Central journal article supplement — Chem Sci. 2019 May 23;10(26):6443–7. doi: 10.1039/c9sc00893d (PMC6611067; doi:10.1039/c9sc00893d), 2019-05-23
Supplement: SC-010-C9SC00893D-s001.pdf [file SC-010-C9SC00893D-s001.pdf]

## Electronic Supporting Information

### A novel mass spectrometry-cleavable, phosphate-based enrichable and multi-targeting protein cross-linker

Rong Huang,<sup>ab#</sup> Wei Zhu,<sup>a#</sup> Yue Wu,<sup>a#</sup> Jiakang Chen<sup>a</sup>, Jianghui Yu<sup>ab</sup>, Biao Jiang,<sup>\*a</sup> Hongli  
Chen,<sup>\*a</sup> Wenzhang Chen<sup>\*a</sup>

<sup>a</sup> Shanghai Institute for Advanced Immunochemical Studies, ShanghaiTech University, 393  
Middle Huaxia Road, Pudong, Shanghai, 201210, China

<sup>b</sup> University of Chinese Academy of sciences, 19A Yuquan Road, Shijingshan District, Beijing,  
100049, China

E-mail: chenhl@shanghaitech.edu.cn; jiangbiao@shanghaitech.edu.cn;  
chenwzh1@shanghaitech.edu.cn

### Table of contents

|                              |     |
|------------------------------|-----|
| General Information .....    | S2  |
| Experimental Procedures..... | S2  |
| Data analysis .....          | S3  |
| References .....             | S16 |

## General Information

All chemical reagents were of analytical grade, obtained from commercial sources and used as supplied without further purification unless indicated.

NMR spectra were recorded on a Bruker-500 (500 MHz) instrument. The deuterated solvents employed were purchased from Energy Chemical. Chemical shifts were given in ppm with respect to referenced solvent peaks. Spectra were analyzed with MestReNova. High-resolution mass spectra (HRMS-ESI) were obtained on an ABSciex 4600 and Thermo fisher EASY1000-Fusion instruments. LC-MS<sup>2</sup> were recorded on Thermo fisher EASY1000-Fusion instrument. The maximum injection times for MS<sup>1</sup>, MS<sup>2</sup> and MS<sup>3</sup> are 50ms, 100ms and 200ms respectively.

## Experimental Procedures

### Synthesis of 1,3-bis(vinylsulfonyl)propan-2-yl dihydrogen phosphate (pBVS)

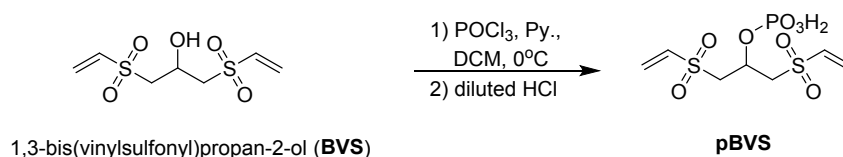

A stirred solution of 1,3-bis(vinylsulfonyl)-2-propanol (**BVS**, 100 mg, 0.42 mmol) in dry DCM (5 mL) was cooled to 0 °C with ice-bath, phosphoryl trichloride (78  $\mu$ L, 0.84 mmol) and pyridine (51  $\mu$ L, 0.63 mmol) was then injected. After stirred at 0 °C to room temperature for 2 h, the reaction was quenched with water and adjusted to weak acidity with diluted HCl. The organic solvent was evaporated, and the resulting mixture was purified by RP-HPLC to afford white solid (8mg, 0.025 mmol), with 6% yield. <sup>1</sup>H NMR (500 MHz, D<sub>2</sub>O)  $\delta$  6.85 (dd,  $J$  = 16.5, 10.0 Hz, 2H), 6.33 (d,  $J$  = 16.5 Hz, 2H), 6.30 (d,  $J$  = 10.0 Hz, 2H), 4.93-4.87 (m, 1H), 3.75 (d,  $J$  = 6.0 Hz, 4H) ppm. <sup>13</sup>C NMR (126 MHz, MeOD)  $\delta$  135.37, 132.38, 65.29, 56.99 ppm. ESI-HRMS calcd for C<sub>25</sub>H<sub>34</sub>N<sub>7</sub>O<sub>7</sub>S<sub>3</sub> [(M+H)<sup>+</sup>]: 320.9868, found:320.9815.

### Cross-linking for BSA

Aqueous solution of **pBVS** (10 mM, 90  $\mu$ L, 30 equiv) was added into 500  $\mu$ L BSA in PBS (different pH), and the mixture was incubated at room temperature or 37 °C for 4 and 15 hours, respectively. Each sample was purified using a Pall™ Nanosep with 3k Omega 100/pk to remove excess reagents and the resulting mixture was characterized by UPLC-MS analysis

### Protein Digestion

The above cross-linked protein was first precipitated using acetone to remove the excess crosslinking reagent, then digested using FASP method as described by Jacek R Winiewski<sup>[1]</sup> with modifications. Briefly, the cross-linked protein was first loaded to a Nanosep filter (10 K, Pall corporation), then was washed twice with 200  $\mu$ L 100 mM Tris-HCl (PH=8). The protein solution was reduced by adding 50 mM DTT in 100 mM Tris-HCl, and incubated at room temperature for two hours and then alkylated with iodoacetamide for 30 min in the dark. After reduction and alkylation, the filter was washed three times using 100 mM Tris-HCl. The protein on the filter was then digested using trypsin dissolved in 200 mM Tris-HCl at 37 °C for four hours. The protein: enzyme ratio is 50 : 1. The digestion solution was then acidified to pH = 2 to deactivate enzyme activity.

### Enrichment of cross-linked peptides

The digested peptides were subsequently enriched by TiO<sub>2</sub> as described by Li-Rong Yu.<sup>[2]</sup> Briefly, the tryptic digested solution was diluted five times using loading buffer (1M glycolic acid, 0.5% TFA in 80% CH<sub>3</sub>CN), then were incubated with 3 mg TiO<sub>2</sub> beads (GL science) at room temperature for 20 mins, the beads were washed once with loading buffer and twice with washing buffer (1% TFA in 80% CH<sub>3</sub>CN) respectively. The peptides were eluted from TiO<sub>2</sub> bead by incubating with 240  $\mu$ L 0.5% NH<sub>4</sub>OH in 100 mM Tris-HCl for 6 min at room temperature. The peptides were acidified to pH = 2 immediately after the elution. The enriched peptides were then desalted using a C18 solid phase extraction column (Hypersep C18, 100 mg Thermo Scientific).

### LC MS/MS analysis

The MS data was acquired on an Orbitrap Fusion MS coupled to a nano Easy LC 1000 and an Easyspray column (75  $\mu$ m  $\times$  50 cm, PepMap RSLC C18 column, 2  $\mu$ m, 100  $\text{\AA}$ , Thermo Scientific). The desalted peptides dissolved in 2% formic acid were loaded to a C18 trap column, then were separated on the Easy spray column, the peptides were eluted from the

Easy spray column using a gradient of 7 to 45% B (0.1% formic acid in CH<sub>3</sub>CN) in 120 min at a flow rate of 250 nL/min. The column temperature was set to 50 °C.

The MS was operated in data dependent mode. CID-MS<sup>2</sup>-MS<sup>3</sup> strategy was employed to identify cross-linked peptides. A survey scan at 120 K resolution was first conducted, then 10 most intense ions were selected (singly and doubly charged ions were excluded from the selection) for fragmentation using low collision energy dissociation (CE = 22). The MS<sup>2</sup> scan was performed in Orbitrap, the MS<sup>2</sup> resolution was set to 30 K. If a signature mass differences of 319.9789 or a signature mass differences of 222.0021 were observed, both the ion pairs were further fragmented by HCD-MS<sup>3</sup> with a collision energy of 30 in ion trap, the MS<sup>3</sup> scan speed was set to turbo. The target AGC of MS<sup>1</sup>, MS<sup>2</sup> and MS<sup>3</sup> scan events were set to 4 × 10<sup>5</sup>, 2 × 10<sup>5</sup> and 1 × 10<sup>5</sup> respectively.

## Data analysis

The reagent in this method can target three different amino acids and generate three different mass tags. Previously reported software tools such as XlinkX are not applicable to the reagent reported in this study. Therefore, an in house written script was employed to do the data analysis. The raw MS<sup>3</sup> data were first searched against BSA sequence using Proteome discover 2.2 (Thermo Scientific), both the Sequest and MS Amanda search engine were used. The precursor mass tolerance was set to 20 ppm and fragment mass tolerance were set to 1.2 da. The following variable modifications were taken into consideration: Carbamidomethyl (C), pBVS(C/H/K), and pBVS-phos (pBVS with loss of one phosphate group). 1% FDR was used to filter away false positive hits. The psm (peptide spectra matches) results and MS/MS spectrum information were exported to .csv format. Linked scan (which scan3 is triggered by which scan2, also which scan2 is triggered by which scan1) information were generated by converting the raw MS data to a quantification file in .txt format using Raw quant software.<sup>[3]</sup> The three files obtained above were analyzed using an in house written R/R CPP script (<https://github.com/wchenSHT/RCPPXLINK>). The analysis is to assign each identified peptide chain sequence to its corresponding MS<sup>1</sup> precursor ion. If two different peptide chains were identified from the same precursor ion, and the mass error is within 10ppm, then the precursor ion is considered as a cross-linked peptide. All the results were further validated manually.

**Table S1:** Evaluation of the cross-linking efficiency in different reaction conditions.

| Entry | Time (h) | Temperature | pH  | Identified cross-linkers |
|-------|----------|-------------|-----|--------------------------|
| 1     | 4        | r.t.        | 7.4 | 29                       |
| 2     | 4        | 37 °C       | 7.4 | 36                       |
| 7     | 15       | r.t.        | 7.4 | 32                       |
| 8     | 15       | 37 °C       | 7.4 | 40                       |
| 9     | 15       | 37 °C       | 8.5 | 49                       |

**Table S2:** The assignment of the fragment ions for crosslinked peptide pair (α-β, NECFLSHKDDSPDLPK and LCVLHEKTPVSEK) in Fig 2.

| Index | m/z       | Peptide sequence | Modification     | Note                              |
|-------|-----------|------------------|------------------|-----------------------------------|
| 1     | 1111.424  | NECFLSHKDDSPDLPK | pBVS linker      |                                   |
| 2     | 1062.4364 | NECFLSHKDDSPDLPK | pBVS linker-phos |                                   |
| 3     | 951.4368  | NECFLSHKDDSPDLPK | None             |                                   |
| 4     | 931.3991  | LCVLHEKTPVSEK    | pBVS linker      | <sup>13</sup> C monoisotopic peak |

|   |          |               |                  |
|---|----------|---------------|------------------|
| 5 | 881.4131 | LCVLHEKTPVSEK | pBVS linker-phos |
| 6 | 770.4108 | LCVLHEKTPVSEK | None             |

**Table S3:** The fragment ions assignment of  $\alpha_{\text{Linker}}$  (mass error < 0.8 da) in Fig 3.

| #1 | b <sup>+</sup> | b <sup>2+</sup> | Seq.              | y <sup>+</sup> | y <sup>2+</sup> | #2 |
|----|----------------|-----------------|-------------------|----------------|-----------------|----|
| 1  | 115.05020      | 58.02874        | N                 |                |                 | 16 |
| 2  | 244.09280      | 122.55004       | E                 | 2107.80578     | 1054.40653      | 15 |
| 3  | 404.12345      | 202.56536       | C-Carbamidomethyl | 1978.76318     | 989.88523       | 14 |
| 4  | 551.19186      | 276.09957       | F                 | 1818.73253     | 909.86991       | 13 |
| 5  | 664.27592      | 332.64160       | L                 | 1671.66412     | 836.33570       | 12 |
| 6  | 751.30795      | 376.15761       | S                 | 1558.58006     | 779.79367       | 11 |
| 7  | 888.36686      | 444.68707       | H                 | 1471.54803     | 736.27765       | 10 |
| 8  | 1336.44073     | 668.72400       | K-CHL-Plinker     | 1334.48912     | 667.74820       | 9  |
| 9  | 1451.46767     | 726.23747       | D                 | 886.41525      | 443.71126       | 8  |
| 10 | 1566.49461     | 783.75094       | D                 | 771.38831      | 386.19779       | 7  |
| 11 | 1653.52664     | 827.26696       | S                 | 656.36137      | 328.68432       | 6  |
| 12 | 1750.57940     | 875.79334       | P                 | 569.32934      | 285.16831       | 5  |
| 13 | 1865.60635     | 933.30681       | D                 | 472.27657      | 236.64193       | 4  |
| 14 | 1978.69041     | 989.84884       | L                 | 357.24963      | 179.12845       | 3  |
| 15 | 2075.74318     | 1038.37523      | P                 | 244.16557      | 122.58642       | 2  |
| 16 |                |                 | K                 | 147.11280      | 74.06004        | 1  |

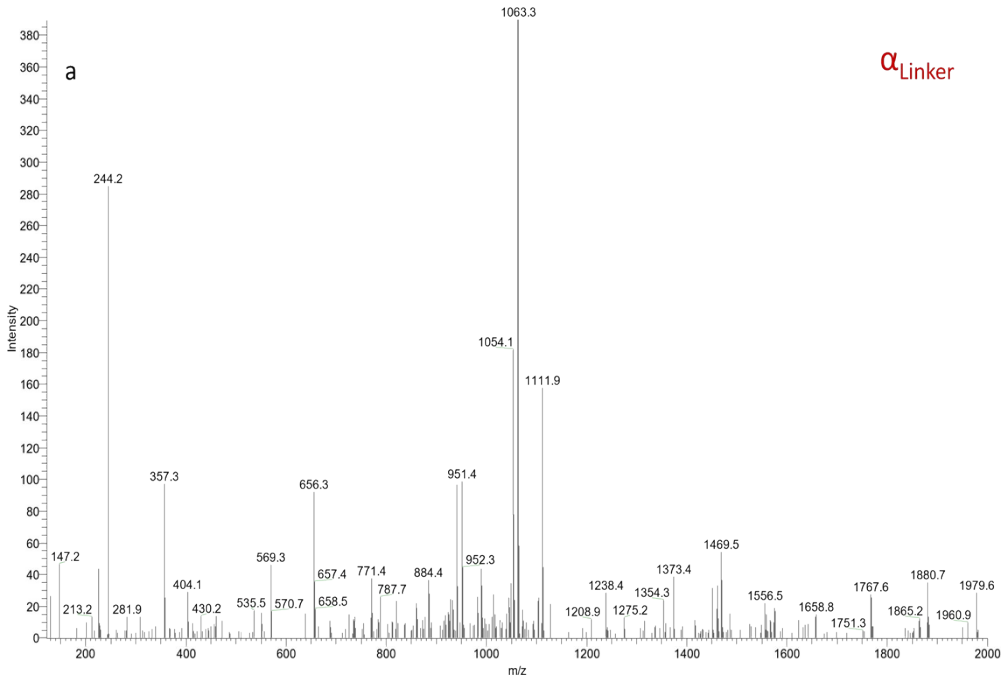

**Figure S1.** The ms/ms spectra of  $\alpha_{\text{Linker}}$  in Fig 3.

**Table S4:** The fragment ions assignment of  $\alpha_{\text{Linker-phos}}$  (mass error < 0.8 da) in Fig 3.

| #1 | b <sup>+</sup> | b <sup>2+</sup> | Seq.              | y <sup>+</sup> | y <sup>2+</sup> | #2 |
|----|----------------|-----------------|-------------------|----------------|-----------------|----|
| 1  | 115.05020      | 58.02874        | N                 |                |                 | 16 |
| 2  | 244.09280      | 122.55004       | E                 | 2009.82688     | 1005.41708      | 15 |
| 3  | 404.12345      | 202.56536       | C-Carbamidomethyl | 1880.78428     | 940.89578       | 14 |
| 4  | 551.19186      | 276.09957       | F                 | 1720.75363     | 860.88046       | 13 |
| 5  | 664.27592      | 332.64160       | L                 | 1573.68522     | 787.34625       | 12 |
| 6  | 751.30795      | 376.15761       | S                 | 1460.60116     | 730.80422       | 11 |
| 7  | 888.36686      | 444.68707       | H                 | 1373.56913     | 687.28820       | 10 |
| 8  | 1238.46183     | 619.73455       | K-CHL-Plinker-P   | 1236.51022     | 618.75875       | 9  |
| 9  | 1353.48877     | 677.24802       | D                 | 886.41525      | 443.71126       | 8  |
| 10 | 1468.51571     | 734.76149       | D                 | 771.38831      | 386.19779       | 7  |
| 11 | 1555.54774     | 778.27751       | S                 | 656.36137      | 328.68432       | 6  |
| 12 | 1652.60050     | 826.80389       | P                 | 569.32934      | 285.16831       | 5  |
| 13 | 1767.62745     | 884.31736       | D                 | 472.27657      | 236.64193       | 4  |
| 14 | 1880.71151     | 940.85939       | L                 | 357.24963      | 179.12845       | 3  |
| 15 | 1977.76428     | 989.38578       | P                 | 244.16557      | 122.58642       | 2  |
| 16 |                |                 | K                 | 147.11280      | 74.06004        | 1  |

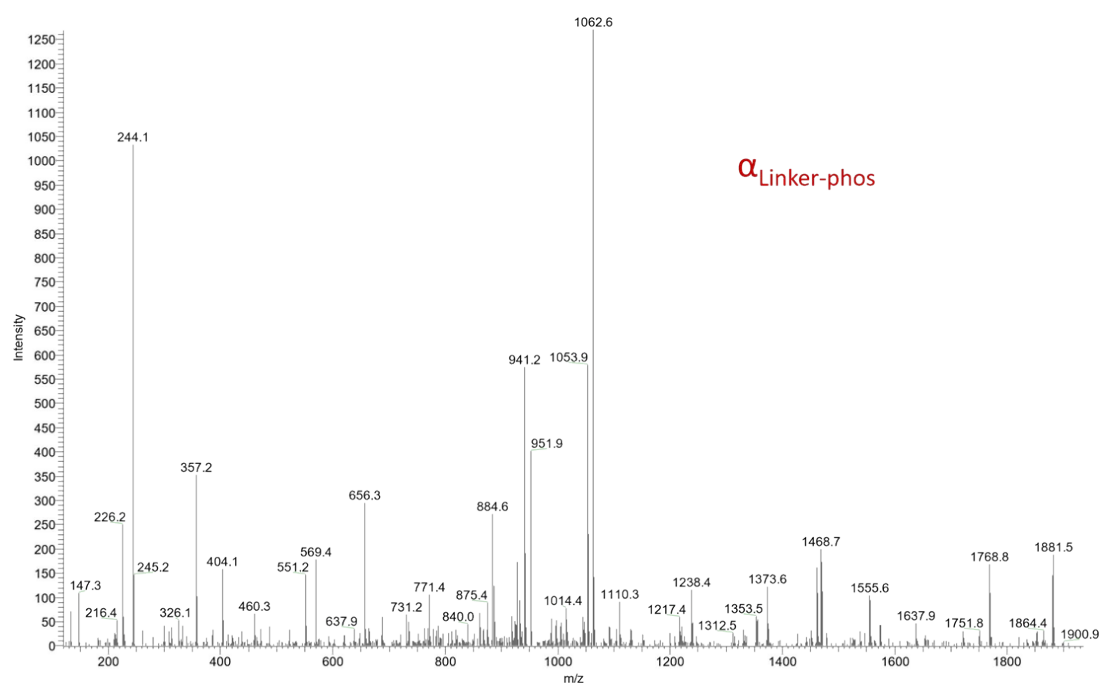

**Figure S2.** The ms/ms spectra of  $\alpha_{\text{Linker-phos}}$  in Fig 3.

**Table S5:** The fragment ions assignment of  $\alpha$  (mass error < 0.8 da) in Fig 3.

| #1 | b <sup>+</sup> | b <sup>2+</sup> | Seq. | y <sup>+</sup> | y <sup>2+</sup> | #2 |
|----|----------------|-----------------|------|----------------|-----------------|----|
|----|----------------|-----------------|------|----------------|-----------------|----|

|    |            |           |                      |            |           |    |
|----|------------|-----------|----------------------|------------|-----------|----|
| 1  | 115.05020  | 58.02874  | N                    |            |           | 16 |
| 2  | 244.09280  | 122.55004 | E                    | 1787.82688 | 894.41708 | 15 |
| 3  | 404.12345  | 202.56536 | C<br>Carbamidomethyl | 1658.78428 | 829.89578 | 14 |
| 4  | 551.19186  | 276.09957 | F                    | 1498.75363 | 749.88046 | 13 |
| 5  | 664.27592  | 332.64160 | L                    | 1351.68522 | 676.34625 | 12 |
| 6  | 751.30795  | 376.15761 | S                    | 1238.60116 | 619.80422 | 11 |
| 7  | 888.36686  | 444.68707 | H                    | 1151.56913 | 576.28820 | 10 |
| 8  | 1016.46183 | 508.73455 | K                    | 1014.51022 | 507.75875 | 9  |
| 9  | 1131.48877 | 566.24802 | D                    | 886.41525  | 443.71126 | 8  |
| 10 | 1246.51571 | 623.76149 | D                    | 771.38831  | 386.19779 | 7  |
| 11 | 1333.54774 | 667.27751 | S                    | 656.36137  | 328.68432 | 6  |
| 12 | 1430.60050 | 715.80389 | P                    | 569.32934  | 285.16831 | 5  |
| 13 | 1545.62745 | 773.31736 | D                    | 472.27657  | 236.64193 | 4  |
| 14 | 1658.71151 | 829.85939 | L                    | 357.24963  | 179.12845 | 3  |
| 15 | 1755.76428 | 878.38578 | P                    | 244.16557  | 122.58642 | 2  |
| 16 |            |           | K                    | 147.11280  | 74.06004  | 1  |

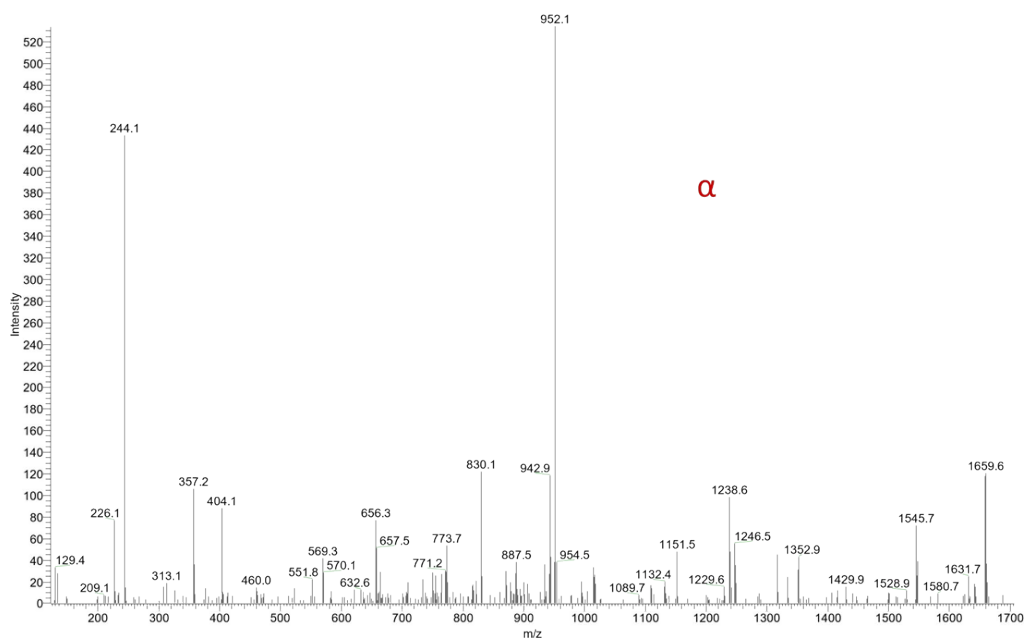

**Figure S3.** The ms/ms spectra of  $\alpha$  in Fig 3.

**Table S6:** The fragment ions assignment of  $\beta_{\text{Linker}}$  (mass error < 0.8 da) in Fig 3.

| #1 | b <sup>+</sup> | b <sup>2+</sup> | Seq.              | y <sup>+</sup> | y <sup>2+</sup> | #2 |
|----|----------------|-----------------|-------------------|----------------|-----------------|----|
| 1  | 114.09134      | 57.54931        | L                 |                |                 | 13 |
| 2  | 274.12199      | 137.56463       | C-Carbamidomethyl | 1746.71478     | 873.86103       | 12 |
| 3  | 373.19040      | 187.09884       | V                 | 1586.68413     | 793.84570       | 11 |
| 4  | 486.27447      | 243.64087       | L                 | 1487.61571     | 744.31150       | 10 |
| 5  | 623.33338      | 312.17033       | H                 | 1374.53165     | 687.76946       | 9  |
| 6  | 752.37597      | 376.69162       | E                 | 1237.47274     | 619.24001       | 8  |
| 7  | 1200.44983     | 600.72856       | K-CHL-Plinker     | 1108.43014     | 554.71871       | 7  |
| 8  | 1301.49751     | 651.25239       | T                 | 660.35628      | 330.68178       | 6  |
| 9  | 1398.55028     | 699.77878       | P                 | 559.30860      | 280.15794       | 5  |
| 10 | 1497.61869     | 749.31298       | V                 | 462.25584      | 231.63156       | 4  |
| 11 | 1584.65072     | 792.82900       | S                 | 363.18743      | 182.09735       | 3  |
| 12 | 1713.69331     | 857.35029       | E                 | 276.15540      | 138.58134       | 2  |
| 13 |                |                 | K                 | 147.11280      | 74.06004        | 1  |

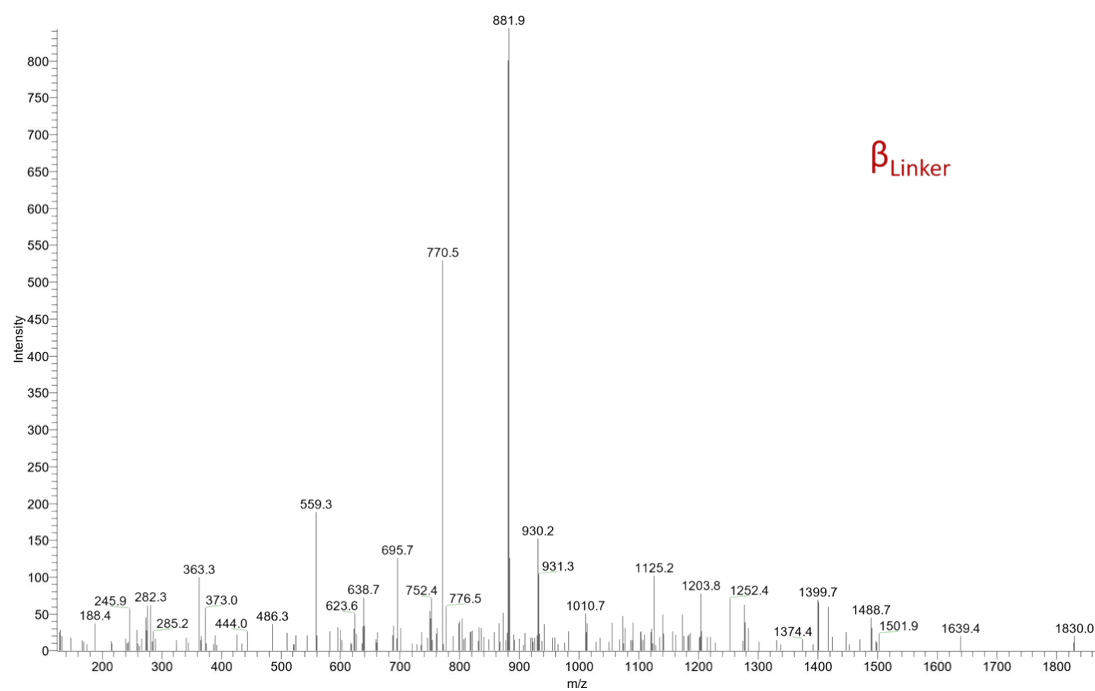

**Figure S4.** The ms/ms spectra of  $\beta_{\text{Linker}}$  in Fig 3.

**Table S7:** The fragment ions assignment of  $\beta_{\text{Linker-phos}}$  (mass error < 0.8 da) in Fig 3.

| #1 | b <sup>+</sup> | b <sup>2+</sup> | Seq. | y <sup>+</sup> | y <sup>2+</sup> | #2 |
|----|----------------|-----------------|------|----------------|-----------------|----|
| 1  | 114.09134      | 57.54931        | L    |                |                 | 13 |
| 2  | 274.12199      | 137.56463       | C    | 1648.73588     | 824.87158       | 12 |

|    |            |           | Carbamidomethyl |            |           |    |
|----|------------|-----------|-----------------|------------|-----------|----|
| 3  | 373.19040  | 187.09884 | V               | 1488.70523 | 744.85625 | 11 |
| 4  | 486.27447  | 243.64087 | L               | 1389.63681 | 695.32205 | 10 |
| 5  | 623.33338  | 312.17033 | H               | 1276.55275 | 638.78001 | 9  |
| 6  | 752.37597  | 376.69162 | E               | 1139.49384 | 570.25056 | 8  |
| 7  | 1102.47093 | 551.73911 | K<br>Plinker-P  | 1010.45124 | 505.72926 | 7  |
| 8  | 1203.51861 | 602.26294 | T               | 660.35628  | 330.68178 | 6  |
| 9  | 1300.57138 | 650.78933 | P               | 559.30860  | 280.15794 | 5  |
| 10 | 1399.63979 | 700.32353 | V               | 462.25584  | 231.63156 | 4  |
| 11 | 1486.67182 | 743.83955 | S               | 363.18743  | 182.09735 | 3  |
| 12 | 1615.71441 | 808.36084 | E               | 276.15540  | 138.58134 | 2  |
| 13 |            |           | K               | 147.11280  | 74.06004  | 1  |

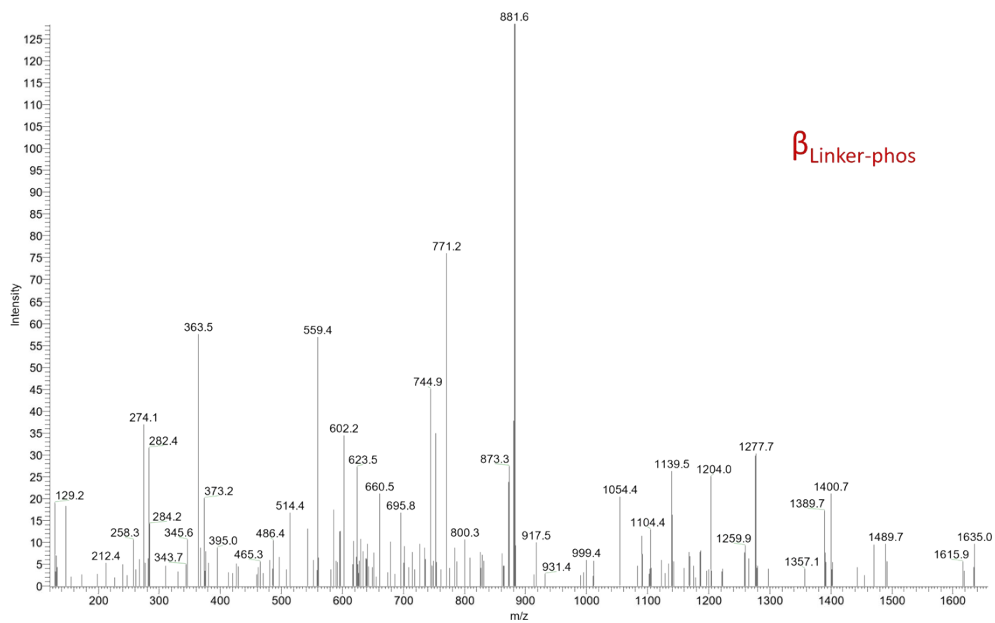

Figure S5. The ms/ms spectra of  $\beta_{\text{Linker-phos}}$  in Fig 3.

Table S8: The fragment ions assignment of  $\beta$  (mass error < 0.8 da) in Fig 3.

| #1 | b <sup>+</sup> | b <sup>2+</sup> | Seq. | y <sup>+</sup> | y <sup>2+</sup> | #2 |
|----|----------------|-----------------|------|----------------|-----------------|----|
| 1  | 114.09134      | 57.54931        | L    |                |                 | 13 |



|    |            |           |                      |            |           |    |
|----|------------|-----------|----------------------|------------|-----------|----|
| 2  | 274.12199  | 137.56463 | C<br>Carbamidomethyl | 1426.73588 | 713.87158 | 12 |
| 3  | 373.19040  | 187.09884 | V                    | 1266.70523 | 633.85625 | 11 |
| 4  | 486.27447  | 243.64087 | L                    | 1167.63681 | 584.32205 | 10 |
| 5  | 623.33338  | 312.17033 | H                    | 1054.55275 | 527.78001 | 9  |
| 6  | 752.37597  | 376.69162 | E                    | 917.49384  | 459.25056 | 8  |
| 7  | 880.47093  | 440.73911 | K                    | 788.45124  | 394.72926 | 7  |
| 8  | 981.51861  | 491.26294 | T                    | 660.35628  | 330.68178 | 6  |
| 9  | 1078.57138 | 539.78933 | P                    | 559.30860  | 280.15794 | 5  |
| 10 | 1177.63979 | 589.32353 | V                    | 462.25584  | 231.63156 | 4  |
| 11 | 1264.67182 | 632.83955 | S                    | 363.18743  | 182.09735 | 3  |
| 12 | 1393.71441 | 697.36084 | E                    | 276.15540  | 138.58134 | 2  |
| 13 |            |           | K                    | 147.11280  | 74.06004  | 1  |

Figure S6. The ms/ms spectra of  $\beta$  in Fig 3.

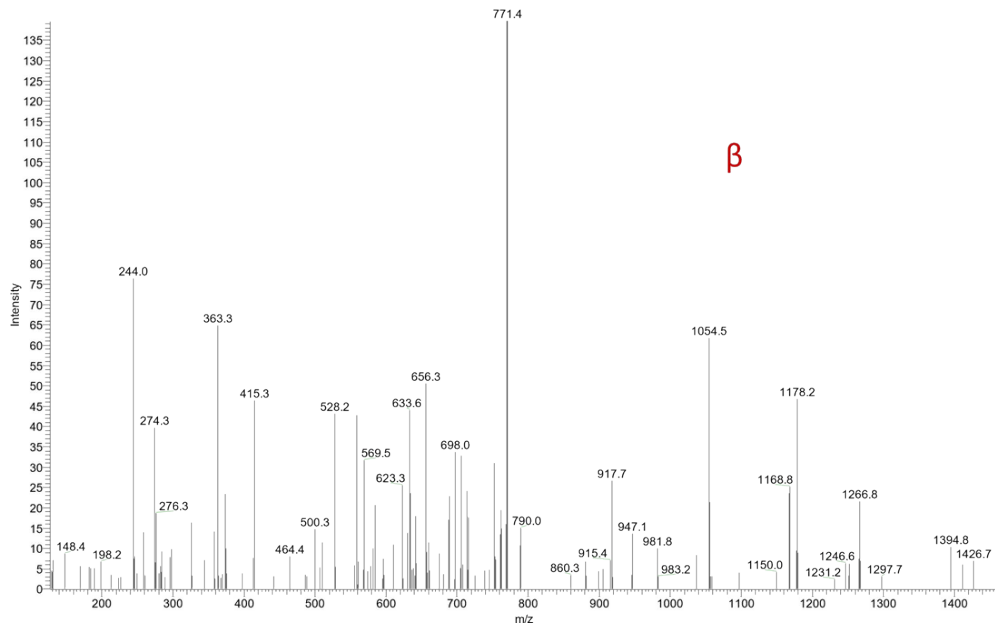

Table S9: The fragment ions assignment of the ion YLQQCPFDEHVK+pBVS (mass error < 0.8 da).

| #1 | b <sup>+</sup> | b <sup>2+</sup> | Seq. | y <sup>+</sup> | y <sup>2+</sup> | #2 |
|----|----------------|-----------------|------|----------------|-----------------|----|
| 1  | 164.07061      | 82.53894        | Y    |                |                 | 12 |

|    |            |           |              |            |           |    |
|----|------------|-----------|--------------|------------|-----------|----|
| 2  | 277.15467  | 139.08097 | L            | 1663.62015 | 832.31371 | 11 |
| 3  | 405.21325  | 203.11026 | Q            | 1550.53608 | 775.77168 | 10 |
| 4  | 533.27182  | 267.13955 | Q            | 1422.47751 | 711.74239 | 9  |
| 5  | 956.25991  | 478.63359 | C<br>Plinker | 1294.41893 | 647.71310 | 8  |
| 6  | 1053.31267 | 527.15997 | P            | 871.43084  | 436.21906 | 7  |
| 7  | 1200.38109 | 600.69418 | F            | 774.37808  | 387.69268 | 6  |
| 8  | 1315.40803 | 658.20765 | D            | 627.30967  | 314.15847 | 5  |
| 9  | 1444.45062 | 722.72895 | E            | 512.28272  | 256.64500 | 4  |
| 10 | 1581.50953 | 791.25841 | H            | 383.24013  | 192.12370 | 3  |
| 11 | 1680.57795 | 840.79261 | V            | 246.18122  | 123.59425 | 2  |
| 12 |            |           | K            | 147.11280  | 74.06004  | 1  |

**Table S10:** The fragment ions assignment of the ions LFTFHADICTLPDTEK+pBVS (mass error < 0.8 da).

| #1 | b <sup>+</sup> | b <sup>2+</sup> | b <sup>3+</sup> | Seq.                 | y <sup>+</sup> | y <sup>2+</sup> | y <sup>3+</sup> | #2 |
|----|----------------|-----------------|-----------------|----------------------|----------------|-----------------|-----------------|----|
| 1  | 114.09134      | 57.54931        | 38.70196        | L                    |                |                 |                 | 16 |
| 2  | 261.15975      | 131.08352       | 87.72477        | F                    | 2114.81561     | 1057.91144      | 705.61006       | 15 |
| 3  | 362.20743      | 181.60735       | 121.40733       | T                    | 1967.74720     | 984.37724       | 656.58725       | 14 |
| 4  | 509.27585      | 255.14156       | 170.43013       | F                    | 1866.69952     | 933.85340       | 622.90469       | 13 |
| 5  | 966.31366      | 483.66047       | 322.77607       | H<br>Plinker         | 1719.63111     | 860.31919       | 573.88189       | 12 |
| 6  | 1037.35077     | 519.17902       | 346.45511       | A                    | 1262.59329     | 631.80029       | 421.53595       | 11 |
| 7  | 1152.37772     | 576.69250       | 384.79742       | D                    | 1191.55618     | 596.28173       | 397.85691       | 10 |
| 8  | 1265.46178     | 633.23453       | 422.49211       | I                    | 1076.52924     | 538.76826       | 359.51460       | 9  |
| 9  | 1425.49243     | 713.24985       | 475.83566       | C<br>Carbamidomethyl | 963.44517      | 482.22622       | 321.81991       | 8  |
| 10 | 1526.54011     | 763.77369       | 509.51822       | T                    | 803.41452      | 402.21090       | 268.47636       | 7  |
| 11 | 1639.62417     | 820.31572       | 547.21291       | L                    | 702.36685      | 351.68706       | 234.79380       | 6  |
| 12 | 1736.67693     | 868.84211       | 579.56383       | P                    | 589.28278      | 295.14503       | 197.09911       | 5  |

|    |            |            |           |   |           |           |           |   |
|----|------------|------------|-----------|---|-----------|-----------|-----------|---|
| 13 | 1851.70388 | 926.35558  | 617.90614 | D | 492.23002 | 246.61865 | 164.74819 | 4 |
| 14 | 1952.75156 | 976.87942  | 651.58870 | T | 377.20308 | 189.10518 | 126.40588 | 3 |
| 15 | 2081.79415 | 1041.40071 | 694.60290 | E | 276.15540 | 138.58134 | 92.72332  | 2 |
| 16 |            |            |           | K | 147.11280 | 74.06004  | 49.70912  | 1 |

**Table S11:** The fragment ions assignment of the ions FWGKYLEIAR+pBVS (mass error < 0.8 da).

| #1 | b <sup>+</sup> | b <sup>2+</sup> | Seq.           | y <sup>+</sup> | y <sup>2+</sup> | #2 |
|----|----------------|-----------------|----------------|----------------|-----------------|----|
| 1  | 148.07569      | 74.54148        | F              |                |                 | 11 |
| 2  | 334.15500      | 167.58114       | W              | 1520.68918     | 760.84823       | 10 |
| 3  | 391.17647      | 196.09187       | G              | 1334.60987     | 667.80857       | 9  |
| 4  | 741.27143      | 371.13935       | K<br>Plinker-P | 1277.58841     | 639.29784       | 8  |
| 5  | 904.33476      | 452.67102       | Y              | 927.49344      | 464.25036       | 7  |
| 6  | 1017.41882     | 509.21305       | L              | 764.43012      | 382.71870       | 6  |
| 7  | 1180.48215     | 590.74471       | Y              | 651.34605      | 326.17666       | 5  |
| 8  | 1309.52474     | 655.26601       | E              | 488.28272      | 244.64500       | 4  |
| 9  | 1422.60881     | 711.80804       | I              | 359.24013      | 180.12370       | 3  |
| 10 | 1493.64592     | 747.32660       | A              | 246.15607      | 123.58167       | 2  |
| 11 |                |                 | R              | 175.11895      | 88.06311        | 1  |

**Table S12:** Unique cross-linked linkages identified of BSA with enrichment.

| No. | Cross-linking site                     | Cross-linked peptides(cross-linked residues in red) | Cα-Cα distance (Å) |
|-----|----------------------------------------|-----------------------------------------------------|--------------------|
| 1   | BSA <sup>239</sup> -BSA <sup>246</sup> | LVTDLTKVHK-ECCHGDLLECADDR                           | 10.51              |
| 2   | BSA <sup>242</sup> -BSA <sup>211</sup> | VHKECCHGDLLECADDR-ALKAWSVAR                         | 10.612             |
| 3   | BSA <sup>465</sup> -BSA <sup>106</sup> | LCVLHEKTPVSEK-NECFLSHKDDSPDLPK                      | 10.942             |
| 4   | BSA <sup>261</sup> -BSA <sup>280</sup> | ADLAKYICDNQDTISSK-ECCDKPILLEKSH                     | 11.232             |
| 5   | BSA <sup>159</sup> -BSA <sup>287</sup> | FYAPELLYANKYNGVFQECQAEDK-SHCIAEVEK                  | 11.749             |
| 6   | BSA <sup>509</sup> -BSA <sup>524</sup> | HADICTLPDTEK-KQTALVELLK                             | 12.053             |
| 7   | BSA <sup>12</sup> -BSA <sup>4</sup>    | FKDLGEEHFK-DTHKSEIAHR                               | 12.655             |
| 8   | BSA <sup>114</sup> -BSA <sup>145</sup> | DDSPDLKPKPDPN-RHPYFYAPELLYANK                       | 12.964             |

---

|    |                                        |                                      |        |
|----|----------------------------------------|--------------------------------------|--------|
| 9  | BSA <sup>337</sup> -BSA <sup>377</sup> | HPEYAVSVLLR-LKHLVDEPQNLIK            | 13.036 |
| 10 | BSA <sup>439</sup> -BSA <sup>431</sup> | CCTKPESER-SLGKVGTR                   | 13.451 |
| 11 | BSA <sup>537</sup> -BSA <sup>413</sup> | HKPKATEEQLK-KVPQVSTPTLVEVSR          | 11.72  |
| 12 | BSA <sup>211</sup> -BSA <sup>350</sup> | ALKAWSVAR-LAKEYEATLEECCA             | 13.625 |
| 13 | BSA <sup>378</sup> -BSA <sup>350</sup> | HLVDEPQNLIK-LAKEYEATLEECCA           | 13.694 |
| 14 | BSA <sup>377</sup> -BSA <sup>350</sup> | LKHLVDEPQNLIK-LAKEYEATLEECCA         | 13.698 |
| 15 | BSA <sup>67</sup> -BSA <sup>242</sup>  | SLHTLFGDELCK-VHKECCHGDLECCADDR       | 13.988 |
| 16 | BSA <sup>287</sup> -BSA <sup>273</sup> | SHCIAEVEK-YICDNQDTISSK               | 14.067 |
| 17 | BSA <sup>159</sup> -BSA <sup>280</sup> | ANKYNGVFQEQCAEDK-ECCDKP LLEK         | 14.218 |
| 18 | BSA <sup>116</sup> -BSA <sup>136</sup> | LKPDNTLCDEFK-FWGKYLEIAR              | 14.431 |
| 19 | BSA <sup>520</sup> -BSA <sup>116</sup> | HADICTLPDTEKQIK-LKPDNTLCDEFK         | 15.555 |
| 20 | BSA <sup>465</sup> -BSA <sup>145</sup> | LCVLHEKTPVSEK-RHPYFYAPELLYYANK       | 16.041 |
| 21 | BSA <sup>239</sup> -BSA <sup>67</sup>  | LVTDLTKVHK-SLHTLFGDELCK              | 16.256 |
| 22 | BSA <sup>12</sup> -BSA <sup>261</sup>  | FKDLGEEHFK-ADLAKYICDNQDTISSK         | 16.359 |
| 23 | BSA <sup>350</sup> -BSA <sup>204</sup> | LAKEYEATLEECCA-CASIQKFGER            | 17.006 |
| 24 | BSA <sup>93</sup> -BSA <sup>106</sup>  | ETYGDMADCEKQEPER-NECFLSHKDDSPDLPK    | 17.186 |
| 25 | BSA <sup>67</sup> -BSA <sup>59</sup>   | SLHTLFGDELCK-TCVADESHAGCEK           | 17.618 |
| 26 | BSA <sup>350</sup> -BSA <sup>474</sup> | LAKEYEATLEECCA-VTKCCTESLVNR          | 18.065 |
| 27 | BSA <sup>221</sup> -BSA <sup>280</sup> | LSQKFPK-LKECCDKP LLEK                | 19.2   |
| 28 | BSA <sup>114</sup> -BSA <sup>431</sup> | DDSPDLPKLPD-SLGKVGTR                 | 19.228 |
| 29 | BSA <sup>439</sup> -BSA <sup>221</sup> | CCTKPESER-LSQKFPK                    | 20.205 |
| 30 | BSA <sup>537</sup> -BSA <sup>471</sup> | HKPKATEEQLK-TPVSEKVTK                | 19.152 |
| 31 | BSA <sup>59</sup> -BSA <sup>76</sup>   | TCVADESHAGCEK-SLHTLFGDELCKVASLR      | 20.467 |
| 32 | BSA <sup>114</sup> -BSA <sup>509</sup> | DDSPDLPKLPDNTLCDEFK-LFTFHADICTLPDTEK | 20.774 |
| 33 | BSA <sup>221</sup> -BSA <sup>242</sup> | LSQKFPK-VHKECCHGDLECCADDR            | 21.527 |
| 34 | BSA <sup>471</sup> -BSA <sup>350</sup> | TPVSEKVTK-LAKEYEATLEECCA             | 21.823 |
| 35 | BSA <sup>180</sup> -BSA <sup>280</sup> | GACLLPKIETMR-ECCDKP LLEK             | 21.84  |
| 36 | BSA <sup>12</sup> -BSA <sup>287</sup>  | FKDLGEEHFK-SHCIAEVEK                 | 22.111 |
| 37 | BSA <sup>465</sup> -BSA <sup>114</sup> | LCVLHEKTPVSEK-DDSPDLPKLPDNTLCDEFK    | 22.241 |

---

|    |                                        |                                                 |        |
|----|----------------------------------------|-------------------------------------------------|--------|
| 38 | BSA <sup>378</sup> -BSA <sup>474</sup> | HLVDEPQNLIK-VTKCCTESLVNR                        | 23.797 |
| 39 | BSA <sup>504</sup> -BSA <sup>114</sup> | AFDEKLFTFHADICTLPDTEK-DDSPDLPKPKPDPNTLCDEFK     | 24.405 |
| 40 | BSA <sup>413</sup> -BSA <sup>378</sup> | KVPQVSTPTLVEVSR-HLVDEPQNLIK                     | 25.408 |
| 41 | BSA <sup>337</sup> -BSA <sup>366</sup> | RHPEYAVSVLLR-DDPHACYSTVFDK                      | 25.409 |
| 42 | BSA <sup>280</sup> -BSA <sup>337</sup> | LKECCDKP LLEK-RHPEYAVSVLLR                      | 29.004 |
| 43 | BSA <sup>127</sup> -BSA <sup>431</sup> | LKPDPNTLCDEFKADEK-SLGKVGTR                      | 35.929 |
| 44 | BSA <sup>375</sup> -BSA <sup>378</sup> | DDPHACYSTVFDK LK-HLVDEPQNLIK                    | 5.827  |
| 45 | BSA <sup>520</sup> -BSA <sup>524</sup> | HADICTLPDTEKQIK-KQTALVELLK                      | 6.491  |
| 46 | BSA <sup>524</sup> -BSA <sup>59</sup>  | KQTALVELLK-TCVADESHAGCEK                        | 60.529 |
| 47 | BSA <sup>261</sup> -BSA <sup>285</sup> | ADLAKYICDNQDTISSK-ECCDKP LLEKSHCIAEVEK          | 9.165  |
| 48 | BSA <sup>145</sup> -BSA <sup>106</sup> | RHPYFYAPEL LLYANK-NECFLSHKDDSPDLPKPKPDPNTLCDEFK | 9.253  |
| 49 | BSA <sup>280</sup> -BSA <sup>287</sup> | ECCDKP LLEK-SHCIAEVEKDAIPENLPPLTADFAEDKDVCK     | 9.893  |

**Table S13:** Unique cross-linked linkages identified of BSA without enrichment.

| No. | Cross-linking site                     | Cross-linked peptides(cross-linked residues in red) | C $\alpha$ -C $\alpha$ distance (Å) |
|-----|----------------------------------------|-----------------------------------------------------|-------------------------------------|
| 1   | BSA <sup>242</sup> -BSA <sup>211</sup> | VHKECCHGDLLECADDR-ALKAWSVAR                         | 10.612                              |
| 2   | BSA <sup>159</sup> -BSA <sup>287</sup> | RHPYFYAPEL LLYANKYNGVFQECQAEDK-SHCIAEVEK            | 11.749                              |
| 3   | BSA <sup>509</sup> -BSA <sup>524</sup> | LFTFHADICTLPDTEK-KQTALVELLK                         | 12.053                              |
| 4   | BSA <sup>12</sup> -BSA <sup>4</sup>    | FKDLGEEHFK-DTHKSEIAHR                               | 12.655                              |
| 5   | BSA <sup>337</sup> -BSA <sup>377</sup> | RHPEYAVSVLLR-LKHLVDEPQNLIK                          | 13.036                              |
| 6   | BSA <sup>159</sup> -BSA <sup>280</sup> | RHPYFYAPEL LLYANKYNGVFQECQAEDK-LKECCDKP LLEK        | 14.218                              |
| 7   | BSA <sup>12</sup> -BSA <sup>261</sup>  | FKDLGEEHFK-ADLAKYICDNQDTISSK                        | 16.359                              |
| 8   | BSA <sup>350</sup> -BSA <sup>474</sup> | LAKEYEATLEECCA-KTKCCTESLVNR                         | 18.065                              |
| 9   | BSA <sup>439</sup> -BSA <sup>221</sup> | CCTKPESER-LSQKFPK                                   | 20.205                              |
| 10  | BSA <sup>221</sup> -BSA <sup>242</sup> | LSQKFPK-VHKECCHGDLLECADDR                           | 21.527                              |
| 11  | BSA <sup>280</sup> -BSA <sup>287</sup> | LKECCDKP LLEK-SHCIAEVEK                             | 9.893                               |
| 12  | BSA <sup>116</sup> -BSA <sup>173</sup> | LKPDPNTLCDEFKADEK-YNGVFQECQAEDKGACLLPK              | 15.436                              |

**Table S14:** Unique cross-linked linkages identified of myoglobin with enrichment.

| No. | Cross-linking site | Cross-linked peptides(cross-linked residues in red) | C $\alpha$ -C $\alpha$ distance (Å) |
|-----|--------------------|-----------------------------------------------------|-------------------------------------|
|-----|--------------------|-----------------------------------------------------|-------------------------------------|

|   |                                                    |                            |        |
|---|----------------------------------------------------|----------------------------|--------|
| 1 | Myoglobin <sup>87</sup> - Myoglobin <sup>145</sup> | GHHEAELKPLAQSH-NDIAAKYK    | 6.996  |
| 2 | Myoglobin <sup>98</sup> - Myoglobin <sup>42</sup>  | HKIPIK-LFTGHPETLEKFDK      | 7.639  |
| 3 | Myoglobin <sup>82</sup> - Myoglobin <sup>145</sup> | GHHEAELKPLAQSH-NDIAAKYK    | 12.88  |
| 4 | Myoglobin <sup>36</sup> - Myoglobin <sup>113</sup> | LFTGHPETLEK-YLEFISDAIHVLSK | 13.896 |
| 5 | Myoglobin <sup>81</sup> - Myoglobin <sup>145</sup> | GHHEAELKPLAQSHATK-NDIAAKYK | 15.202 |
| 6 | Myoglobin <sup>36</sup> - Myoglobin <sup>116</sup> | LFTGHPETLEK-YLEFISDAIHVLSK | 19.117 |
| 7 | Myoglobin <sup>145</sup> - Myoglobin <sup>62</sup> | NDIAAKYK-ASEDLKK           | 28.253 |

**Table S15:** Unique cross-linked linkages identified of Cpf1 with enrichment.

| No. | Cross-linking site                       | Cross-linked peptides(cross-linked residues in red) | Ca-Ca distance (Å) |
|-----|------------------------------------------|-----------------------------------------------------|--------------------|
| 1   | CPF <sup>323</sup> -CPF <sup>319</sup>   | LEKLFK-NSEIFSSIKK                                   | 6.281              |
| 2   | CPF <sup>797</sup> -CPF <sup>20</sup>    | FSEDQYELHIPIAINK-FKAIPVGK                           | 8.871              |
| 3   | CPF <sup>707</sup> -CPF <sup>20</sup>    | LYMFQYINKDFSDK-FKAIPVGK                             | 9.374              |
| 4   | CPF <sup>326</sup> -CPF <sup>319</sup>   | LFKNFDEYSSAGIFVK-NSEIFSSIKK                         | 10.406             |
| 5   | CPF <sup>370</sup> -CPF <sup>374</sup>   | DKWNAEYDDIHLK-KAVVTEK                               | 11.146             |
| 6   | CPF <sup>707</sup> -CPF <sup>720</sup>   | LYMFQYINKDFSDK-SHGTPNLHTMYFK                        | 11.748             |
| 7   | CPF <sup>1216</sup> -CPF <sup>1061</sup> | IAISNKEWLEYAQTSVKH-TDADYIKK                         | 11.933             |
| 8   | CPF <sup>20</sup> -CPF <sup>787</sup>    | FKAIPVGK-TTTLSDVYKDKR                               | 13.745             |
| 9   | CPF <sup>51</sup> -CPF <sup>42</sup>     | AEDYKGVKK-LLVEDEKR                                  | 14.239             |
| 10  | CPF <sup>1277</sup> -CPF <sup>1061</sup> | IAISNKEWLEYAQTSVKH-TDADYIKK                         | 16.24              |
| 11  | CPF <sup>712</sup> -CPF <sup>20</sup>    | DFSDKSHGTPNLHTMYFK-FKAIPVGK                         | 17.17              |
| 12  | CPF <sup>20</sup> -CPF <sup>714</sup>    | FKAIPVGK-DFSDKSHGTPNLHTMYFK                         | 19.392             |
| 13  | CPF <sup>326</sup> -CPF <sup>310</sup>   | LFKNFDEYSSAGIFVK-NLKNSEIFSSIK                       | 20.015             |
| 14  | CPF <sup>20</sup> -CPF <sup>34</sup>     | FKAIPVGK-TQENIDNKR                                  | 22.328             |
| 15  | CPF <sup>733</sup> -CPF <sup>811</sup>   | LLFDENNHGQIR-NIFKINTEVR                             | 24.922             |
| 16  | CPF <sup>51</sup> -CPF <sup>514</sup>    | AEDYKGVKK-NYVTQKPYSK                                | 26.466             |
| 17  | CPF <sup>787</sup> -CPF <sup>687</sup>   | TTTSLSDVYKDKR-VSFESASK                              | 31.809             |
| 18  | CPF <sup>51</sup> -CPF <sup>538</sup>    | AEDYKGVKK-LYFQNPQFMGGWDKDKETDYS                     | 33.062             |
| 19  | CPF <sup>733</sup> -CPF <sup>560</sup>   | LLFDENNHGQIR-YYLAIMDKK                              | 34.523             |

### <sup>1</sup>H NMR of pBVS

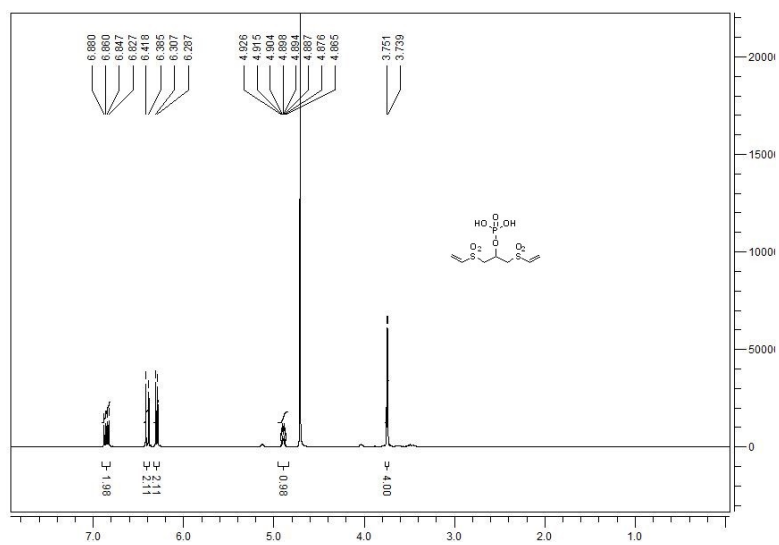

### <sup>13</sup>C NMR of pBVS

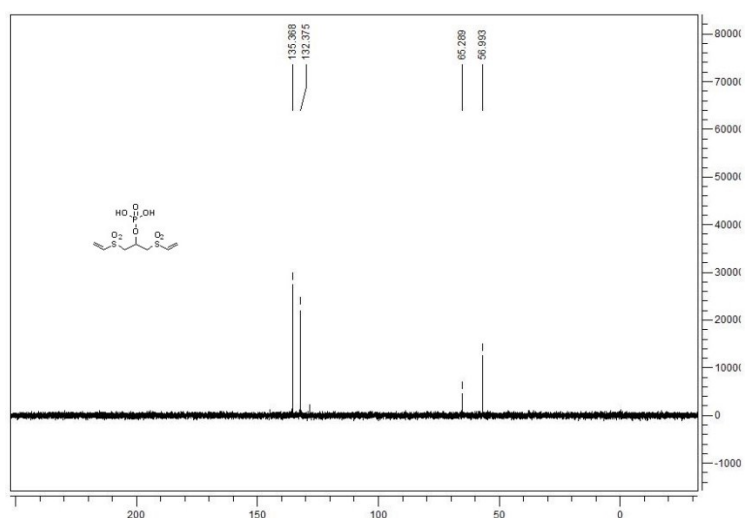

### HR-MS-ESI of pBVS

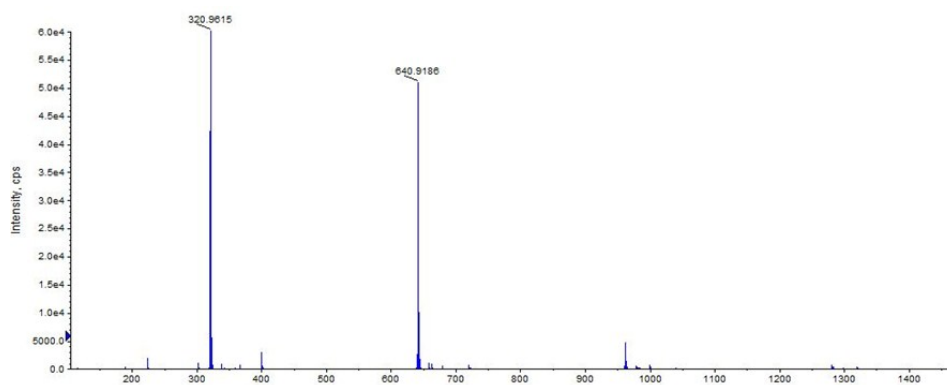

## References

- [1] J. R. Wisniewski, A. Zougman, N. Nagaraj, M. Mann, *Nat. Methods*. **2009**, *6*, 359-362.
- [2] L. R. Yu, Z. Zhu, K. C. Chan, H. J. Issaq, D. S. Dimitrov, T. D. Veenstra, *J. Proteome Res.* **2007**, *6*, 4150-4162.
- [3] K. A. Kovalchik, S. Moggridge, D. D. Y. Chen, G. B. Morin, C.S. Hughes, *J Proteome Res* **2018**, *17*, 2237-2247.
